# Supplementary material
Source: HighWire-hosted journal article supplement (http://www.ajnr.org/highwire/filestream/52266/field_highwire_adjunct_files/0/1331_table.pdf)
Supplement: 1331_table.pdf [file 1331_table.pdf]

Summary of fetal MR imaging findings

| Patient No. | GA (wks) by LMP | Sulcation Delay | Abnl Sulcal Morphology | Dysplastic Ventricles | Abnl Multi-Layered Pattern | PVNH | Abnl T2 Signal | Abnl Deep Gray Nuclei | Abnl Cerebellum | Abnl Pons | Abnl Vermis | Postnatal MR | PM | Outcome |
|-------------|-----------------|-----------------|------------------------|-----------------------|----------------------------|------|----------------|-----------------------|-----------------|-----------|-------------|--------------|----|---------|
| 1           | 19.71           | +               | +                      | +                     | -                          | +    | -              | -                     | +               | -         | -           | -            | -  | -       |
| 2           | 21.00           | +               | -                      | -                     | -                          | -    | -              | +                     | +               | +         | +           | -            | +  | -       |
| 3           | 21.00           | +               | -                      | -                     | +                          | -    | +              | -                     | +               | -         | +           | -            | -  | -       |
| 4           | 21.43           | +               | -                      | -                     | -                          | (+)  | -              | -                     | -               | -         | -           | -            | -  | -       |
| 5°          | 21.43           | +               | +                      | +                     | +                          | (+)  | +              | -                     | -               | -         | -           | -            | -  | -       |
| 6           | 21.86           | +               | -                      | -                     | -                          | -    | -              | -                     | -               | +         | +           | +            | -  | Poor    |
| 7           | 22.00           | +               | +                      | +                     | +                          | +    | -              | -                     | +               | +         | +           | -            | -  | Poor    |
| 8~          | 22.14           | +               | +                      | +                     | +                          | (+)  | +              | -                     | +               | +         | +           | -            | -  | Poor    |
| 9           | 22.57           | +               | -                      | -                     | +                          | -    | +              | +                     | +               | +         | +           | -            | +  | -       |
| 10          | 23.00           | +               | +                      | -                     | +                          | -    | +              | -                     | +               | +         | +           | -            | -  | -       |
| 11          | 23.43           | +               | -                      | -                     | -                          | -    | -              | -                     | -               | -         | -           | -            | -  | -       |
| 12          | 24.57           | +               | -                      | -                     | -                          | -    | -              | -                     | -               | -         | -           | -            | -  | -       |
| 13          | 25.71           | +               | -                      | -                     | +                          | -    | -              | -                     | +               | +         | -           | +            | -  | Poor    |
| 14          | 25.86           | +               | -                      | -                     | +                          | -    | -              | -                     | -               | -         | -           | -            | -  | Good    |
| 15          | 26.14           | +               | +                      | +                     | +                          | +    | +              | -                     | +               | +         | +           | -            | -  | Poor    |
| 16~         | 26.43           | +               | +                      | -                     | -                          | -    | -              | -                     | +               | -         | -           | -            | -  | Good    |
| 17          | 26.43           | +               | +                      | +                     | -                          | -    | -              | -                     | -               | -         | -           | -            | -  | -       |
| 18          | 28.00           | +               | -                      | -                     | -                          | -    | +              | -                     | -               | -         | -           | -            | -  | Good    |
| 19          | 28.14           | +               | C/A                    | -                     | C/A                        | (+)  | -              | -                     | C/A             | C/A       | C/A         | +            | -  | Good    |
| 20          | 28.86           | +               | +                      | +                     | +                          | -    | +              | -                     | -               | -         | -           | -            | -  | -       |
| 21          | 29.57           | +               | +                      | -                     | -                          | -    | -              | +                     | +               | +         | +           | -            | -  | -       |
| 22          | 30.43           | -               | +                      | -                     | -                          | -    | -              | -                     | +               | -         | +           | -            | -  | -       |
| 23          | 32.28           | -               | +                      | -                     | -                          | -    | -              | -                     | (+)             | -         | +           | -            | -  | -       |
| 24          | 32.28           | -               | +                      | -                     | -                          | -    | -              | -                     | -               | -         | -           | +            | -  | Good    |
| 25          | 32.57           | C/A             | C/A                    | -                     | -                          | +    | C/A            | +                     | +               | +         | +           | +            | +  | Poor    |
| 26          | 34.57           | -               | -                      | -                     | -                          | +    | +              | -                     | -               | -         | -           | -            | +  | Poor    |
| 27          | 36.00           | -               | -                      | -                     | -                          | (+)  | -              | -                     | -               | -         | -           | +            | -  | Good    |
| 28          | 36.00           | -               | +                      | -                     | -                          | +    | -              | -                     | +               | +         | +           | +            | +  | Poor    |
| 29          | 36.43           | -               | -                      | -                     | -                          | +    | -              | -                     | -               | -         | -           | +            | -  | Good    |
| Total       |                 | 20              | 12                     | 7                     | 11                         | 9(5) | 9              | 5                     | 13(2)           | 11        | 12          | 8            | 4  |         |

Note:—GA indicates gestational age; Wks, weeks; LMP, last menstrual period; Abnl, abnormal; PVNH, periventricular nodular heterotopia; PM, postmortem; (+), suspicious findings; ~, second fetal MR imaging (MRI) performed 6 weeks later; °, second fetal MRI performed 7 weeks later; C/A, could not assess due to marked hydrocephalus (patient 25) or fair-quality images (patients 19 and 24).
